# Supplementary material for: A pH-sensitive, stimuli-responsive, superabsorbent, smart hydrogel from psyllium (Plantago ovata) for intelligent drug delivery
Source: Royal Society of Chemistry journal article supplement (doi:10.1039/d1ra02219a), 2021-01-01
Supplement: d1ra02219a1.pdf [file d1ra02219a1.pdf]

## Supporting Information

### **A pH-sensitive, stimuli responsive, superabsorbent, smart hydrogel from Psyllium (*Plantago ovata*) for intelligent drug delivery**

#### **Materials and methods**

##### *Temperature dependent swelling of PSH*

For the determination of temperature dependent equilibrium swelling of PSH in DW at different temperatures, i.e., 25, 50, 60 and 70 °C for 12 h, PSH (0.1 g) was enclosed in each of the four tea-bags and placed in four beakers containing 100 mL DW each previously maintained at above mentioned temperatures. Swelling capacity of PSH was determined using eqn (6). Each experiment was repeated thrice and mean value was reported.

#### **Results and discussion**

##### *Temperature dependent equilibrium swelling of PSH*

Amongst the stimuli-responsive hydrogels, the temperature responsive hydrogels are one of the current research interests for their applications in drugs delivery.<sup>1</sup> In some pathological conditions, the body temperature may change which imparts its effect on the release of drugs from such drug delivery systems.<sup>2,3</sup> Keeping in view the importance of temperature for drug delivery systems, the equilibrium swelling capacity of PSH was evaluated in DW at different temperatures, i.e., 25, 50, 60 and 70 °C. Results revealed that swelling of PSH is temperature dependent and increased with the increase in temperature (Fig. S1). This might be because of the fact that by increasing temperature, segmental movement of the hydrogel chains also increased. Hence, water sorption capacity of polymer increased. The maximum and minimum equilibrium swelling of PSH was observed at 70 °C and 25 °C, respectively.

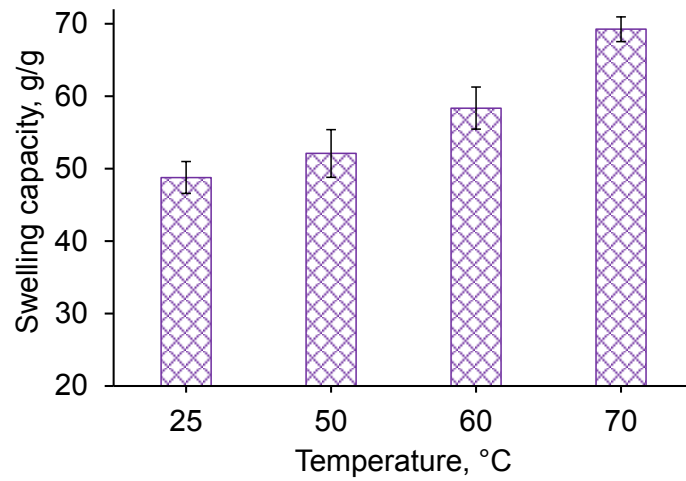

**Fig. S1** Equilibrium swelling capacity of PSH powder in DW at different temperatures.

*Sub-acute toxicity studies*

**Table S1** Body weight, and food and water intake of rats from treated and untreated groups

| Parameters             | Group I     | Group II    | Group III   | Group IV    |
|------------------------|-------------|-------------|-------------|-------------|
| <i>Body weight (g)</i> |             |             |             |             |
| Pretreatment           | 218.21±5.68 | 201.17±4.57 | 233.41±7.71 | 245.15±6.78 |
| Day 1                  | 218.09±6.11 | 200.79±5.53 | 232.52±4.47 | 245.74±5.45 |
| Day 2                  | 219.15±5.29 | 199.40±6.45 | 232.37±6.18 | 244.81±4.21 |
| Day 3                  | 219.57±4.06 | 199.37±7.52 | 231.46±5.51 | 243.08±6.39 |
| Day 5                  | 223.42±5.83 | 200.07±4.66 | 229.91±3.81 | 241.82±3.64 |
| Day 7                  | 230.78±6.29 | 198.86±3.11 | 227.33±4.12 | 238.81±7.43 |
| Day 14                 | 245.42±7.76 | 196.56±6.91 | 224.15±5.35 | 235.36±6.71 |

|        |             |             |              |              |
|--------|-------------|-------------|--------------|--------------|
| Day 21 | 261.48±5.31 | 194.31±7.17 | 222.19±4.83* | 230.67±5.49* |
| Day 28 | 276.89±7.02 | 192.14±4.92 | 220.48±5.22* | 224.37±6.18* |

*Water intake (mL)*

|              |            |           |           |           |
|--------------|------------|-----------|-----------|-----------|
| Pretreatment | 8.04±1.16  | 8.09±1.85 | 8.18±1.63 | 8.52±1.72 |
| Day 1        | 8.50±1.31  | 8.13±2.90 | 8.87±1.58 | 8.13±2.21 |
| Day 2        | 8.34±1.19  | 7.95±2.28 | 8.78±1.13 | 8.76±1.19 |
| Day 3        | 9.05±1.81  | 7.54±1.60 | 8.56±2.23 | 7.89±2.20 |
| Day 7        | 9.57±2.26  | 7.25±1.53 | 8.18±2.06 | 7.70±1.18 |
| Day 14       | 9.93±1.22  | 7.47±1.96 | 7.82±1.16 | 7.16±2.03 |
| Day 21       | 10.15±1.75 | 7.28±1.15 | 7.64±1.39 | 6.58±1.32 |
| Day 28       | 10.41±1.66 | 7.19±2.42 | 7.31±1.13 | 6.27±2.01 |

*Food intake (g)*

|              |           |           |           |           |
|--------------|-----------|-----------|-----------|-----------|
| Pretreatment | 6.19±1.58 | 5.84±1.31 | 6.41±1.53 | 6.67±2.35 |
| Day 1        | 6.29±0.86 | 5.58±1.05 | 6.21±1.27 | 6.45±1.37 |
| Day 2        | 6.50±1.76 | 5.42±1.32 | 6.11±1.80 | 6.27±0.71 |
| Day 3        | 6.71±1.29 | 5.32±1.45 | 6.05±1.64 | 6.09±1.92 |
| Day 7        | 7.85±1.64 | 5.01±.83  | 5.96±1.44 | 5.85±2.33 |
| Day 14       | 8.71±2.37 | 4.94±1.68 | 5.67±1.18 | 5.44±.87  |
| Day 21       | 9.48±2.10 | 4.77±1.81 | 5.26±1.23 | 4.68±1.55 |

Day 28                      10.45±2.53      4.67±1.11      4.70±2.48\*      4.06±1.31\*

---

Values expressed as mean ± SEM

\*  $p < 0.05$  compared with control group

**Table S2** Absolute organ weight (g) of rats

| Organs    | Group I    | Group II   | Group III  | Group IV   |
|-----------|------------|------------|------------|------------|
| Heart     | 0.285±0.01 | 0.273±0.01 | 0.296±0.01 | 0.303±0.01 |
| Kidney    | 0.647±0.02 | 0.629±0.04 | 0.677±0.01 | 0.716±0.01 |
| Stomach   | 1.661±0.02 | 1.646±0.03 | 1.772±0.02 | 2.024±0.05 |
| Intestine | 5.968±0.04 | 6.075±0.03 | 6.109±0.15 | 6.149±0.06 |
| Liver     | 3.619±0.06 | 3.587±0.10 | 3.740±0.11 | 3.840±0.07 |

---

Values expressed as mean ± SEM

## References

- 1 Y. J. Kim and Y. T. Matsunaga, *J. Mater. Chem. B*. 2017, **5**, 4307–4321.
- 2 H. Huang, X. Qi, Y. Chen and Z. Wu, *Saudi Pharm. J.* 2019, **27**, 990–999.
- 3 P. Patel, A. Mandal, V. Gote, D. Pal and A. K. Mitra, *J. Polym. Res.* 2019, **26**, 131.
